# Supplementary material for: A feed forward loop enforces YAP/TAZ signaling during tumorigenesis
Source: PubMed Central journal article supplement (PMC6115388; doi:10.1038/s41467-018-05939-2), 2018-08-29
Supplement: 41467_2018_5939_MOESM2_ESM.pdf [file 41467_2018_5939_MOESM2_ESM.pdf]

## **Description of Additional Supplementary Files**

File Name: Supplementary Movie 1

Description: Time-lapse imaging of Clover-YAP WT in MDA-MB231 cells. Localization of Clover-YAP WT was monitored before and after addition of WZ4003. Images were captured every 10 min for 2 hours. Note that the nuclear signal is gradually lost after addition of WZ4003. The scale and timestamp are indicated in the movie.

File Name: Supplementary Movie 2

Description: Time-lapse imaging of Clover-YAP 5SA in MDA-MB231 cells. Localization of Clover-YAP 5SA was monitored before and after addition of WZ4003. Images were captured every 10 min for 2 hours. Note that the nuclear signal of CloverYAP 5SA is not affected by WZ4003 treatment. The scale and timestamp are indicated in the movie.
